# Supplementary material
Source: publisher figshare collection journal article supplement (https://acs.figshare.com/ndownloader/files/4136596)
Supplement: Supplementary file 1 [file 4136596]

Archive with 2 entries (2 files):
- Readme.pdf
- NaCl_dihydrate.txt
