# Supplementary material
Source: publisher figshare collection journal article supplement (https://acs.figshare.com/ndownloader/files/4136596)
Supplement: Supplementary file 1 [file 4136596 › NaCl_dihydrate.txt]

5999.55603	1.44000	0
5997.64892	1.43999	0
5995.70707	1.43998	0
5993.80241	1.43996	0
5991.86305	1.43995	0
5989.92495	1.43994	0
5987.98810	1.43992	0
5986.08833	1.43991	0
5984.15396	1.43990	0
5982.22084	1.43989	0
5980.28897	1.43987	0
5978.35834	1.43986	0
5976.42896	1.43985	0
5974.50083	1.43984	0
5972.57394	1.43982	0
5970.64829	1.43981	0
5968.72389	1.43980	0
5966.76512	1.43979	0
5964.84321	1.43977	0
5962.92255	1.43976	0
5961.00312	1.43975	0
5959.08492	1.43973	0
5957.13247	1.43972	0
5955.21677	1.43971	0
5953.26686	1.43969	0
5951.35364	1.43968	0
5949.44164	1.43967	0
5947.49551	1.43966	0
5945.58600	1.43964	0
5943.64238	1.43963	0
5941.70004	1.43961	0
5939.79425	1.43960	0
5937.85442	1.43959	0
5935.91585	1.43958	0
5934.01377	1.43956	0
5932.07771	1.43955	0
5930.14292	1.43954	0
5928.20938	1.43952	0
5926.27711	1.43951	0
5924.34610	1.43950	0
5922.41635	1.43948	0
5920.48785	1.43947	0
5918.56061	1.43946	0
5916.63462	1.43944	0
5914.70988	1.43943	0
5912.78640	1.43942	0
5910.86417	1.43940	0
5908.94319	1.43939	0
5906.98856	1.43938	0
5905.07009	1.43936	0
5903.15287	1.43935	0
5901.20207	1.43934	0
5899.28737	1.43932	0
5897.37390	1.43931	0
5895.42692	1.43929	0
5893.51595	1.43928	0
5891.57152	1.43927	0
5889.62836	1.43926	0
5887.72116	1.43924	0
5885.78054	1.43923	0
5883.84121	1.43921	0
5881.93775	1.43920	0
5880.00094	1.43918	0
5878.06541	1.43917	0
5876.13116	1.43916	0
5874.19817	1.43914	0
5872.30094	1.43913	0
5870.37048	1.43912	0
5868.44128	1.43910	0
5866.51336	1.43909	0
5864.58669	1.43907	0
5862.62693	1.43906	0
5860.70282	1.43904	0
5858.77997	1.43903	0
5856.85838	1.43902	0
5854.93805	1.43900	0
5853.01899	1.43899	0
5851.06694	1.43898	0
5849.15041	1.43896	0
5847.20094	1.43895	0
5845.28695	1.43893	0
5843.37420	1.43892	0
5841.42858	1.43890	0
5839.51836	1.43889	0
5837.57530	1.43887	0
5835.63355	1.43886	0
5833.72711	1.43885	0
5831.78791	1.43883	0
5829.85000	1.43882	0
5827.94734	1.43880	0
5826.01198	1.43879	0
5824.07790	1.43878	0
5822.14511	1.43876	0
5820.21360	1.43875	0
5818.28337	1.43873	0
5816.35443	1.43872	0
5814.42676	1.43870	0
5812.50036	1.43869	0
5810.57525	1.43867	0
5808.65141	1.43866	0
5806.72884	1.43864	0
5804.77385	1.43863	0
5802.85384	1.43861	0
5800.93511	1.43860	0
5799.01765	1.43858	0
5797.06784	1.43857	0
5795.15293	1.43855	0
5793.20573	1.43854	0
5791.29337	1.43853	0
5789.34876	1.43851	0
5787.43894	1.43850	0
5785.49692	1.43848	0
5783.58964	1.43846	0
5781.65020	1.43845	0
5779.71205	1.43844	0
5777.80859	1.43842	0
5775.87302	1.43840	0
5773.93875	1.43839	0
5772.00577	1.43838	0
5770.07409	1.43836	0
5768.14370	1.43834	0
5766.21460	1.43833	0
5764.28678	1.43831	0
5762.36026	1.43830	0
5760.43503	1.43828	0
5758.51108	1.43827	0
5756.58842	1.43825	0
5754.63392	1.43824	0
5752.71384	1.43822	0
5750.79505	1.43821	0
5748.87753	1.43819	0
5746.92827	1.43818	0
5745.01333	1.43816	0
5743.06668	1.43815	0
5741.15432	1.43813	0
5739.21028	1.43812	0
5737.30049	1.43810	0
5735.35906	1.43809	0
5733.41895	1.43807	0
5731.51300	1.43805	0
5729.57550	1.43804	0
5727.63930	1.43802	0
5725.70440	1.43801	0
5723.80358	1.43799	0
5721.87128	1.43797	0
5719.94028	1.43796	0
5718.01059	1.43794	0
5716.08220	1.43793	0
5714.15511	1.43791	0
5712.22931	1.43790	0
5710.30482	1.43788	0
5708.38162	1.43786	0
5706.42715	1.43785	0
5704.50656	1.43783	0
5702.58726	1.43781	0
5700.63676	1.43780	0
5698.72007	1.43778	0
5696.80466	1.43777	0
5694.85811	1.43775	0
5692.94530	1.43774	0
5691.00139	1.43772	0
5689.09117	1.43770	0
5687.14988	1.43769	0
5685.20993	1.43767	0
5683.30359	1.43765	0
5681.36625	1.43764	0
5679.43024	1.43762	0
5677.49554	1.43761	0
5675.59438	1.43759	0
5673.66229	1.43757	0
5671.73152	1.43755	0
5669.80207	1.43754	0
5667.87392	1.43752	0
5665.94709	1.43751	0
5664.02157	1.43749	0
5662.06529	1.43747	0
5660.14241	1.43745	0
5658.22083	1.43744	0
5656.30055	1.43742	0
5654.38158	1.43741	0
5652.43196	1.43739	0
5650.51561	1.43737	0
5648.56865	1.43735	0
5646.65492	1.43734	0
5644.71062	1.43732	0
5642.79951	1.43731	0
5640.85786	1.43729	0
5638.94935	1.43727	0
5637.01036	1.43725	0
5635.07269	1.43724	0
5633.13636	1.43722	0
5631.23307	1.43720	0
5629.29938	1.43718	0
5627.36701	1.43717	0
5625.43597	1.43715	0
5623.50626	1.43714	0
5621.57786	1.43712	0
5619.65079	1.43710	0
5617.72505	1.43708	0
5615.80062	1.43707	0
5613.87751	1.43705	0
5611.92422	1.43703	0
5610.00376	1.43701	0
5608.08461	1.43700	0
5606.16678	1.43698	0
5604.21886	1.43696	0
5602.30367	1.43694	0
5600.35842	1.43693	0
5598.44587	1.43691	0
5596.50330	1.43689	0
5594.59338	1.43687	0
5592.65349	1.43686	0
5590.71494	1.43684	0
5588.80897	1.43682	0
5586.87308	1.43680	0
5584.93854	1.43679	0
5583.00533	1.43677	0
5581.07346	1.43675	0
5579.14293	1.43673	0
5577.21374	1.43671	0
5575.28587	1.43669	0
5573.35934	1.43668	0
5571.43414	1.43666	0
5569.51027	1.43664	0
5567.58773	1.43662	0
5565.66652	1.43661	0
5563.71567	1.43659	0
5561.79713	1.43657	0
5559.87991	1.43655	0
5557.93312	1.43653	0
5556.01856	1.43651	0
5554.07447	1.43650	0
5552.16257	1.43647	0
5550.22118	1.43646	0
5548.31193	1.43644	0
5546.37323	1.43642	0
5544.43588	1.43640	0
5542.49989	1.43639	0
5540.59595	1.43636	0
5538.66263	1.43635	0
5536.73067	1.43633	0
5534.80006	1.43631	0
5532.87079	1.43629	0
5530.94286	1.43627	0
5529.01628	1.43625	0
5527.09104	1.43624	0
5525.16714	1.43622	0
5523.24457	1.43620	0
5521.29287	1.43618	0
5519.37300	1.43616	0
5517.45447	1.43614	0
5515.50685	1.43612	0
5513.59100	1.43610	0
5511.64611	1.43609	0
5509.73294	1.43606	0
5507.79077	1.43605	0
5505.88028	1.43602	0
5503.94082	1.43601	0
5502.00273	1.43599	0
5500.09625	1.43597	0
5498.16087	1.43595	0
5496.22684	1.43593	0
5494.29418	1.43591	0
5492.36287	1.43589	0
5490.43292	1.43587	0
5488.50433	1.43585	0
5486.57709	1.43583	0
5484.65120	1.43581	0
5482.72667	1.43579	0
5480.80349	1.43578	0
5478.88165	1.43575	0
5476.93117	1.43574	0
5475.01205	1.43571	0
5473.09427	1.43570	0
5471.14790	1.43567	0
5469.23283	1.43566	0
5467.28921	1.43563	0
5465.37684	1.43562	0
5463.43595	1.43559	0
5461.52628	1.43558	0
5459.58813	1.43555	0
5457.65135	1.43554	0
5455.71595	1.43551	0
5453.81167	1.43550	0
5451.87899	1.43547	0
5449.94768	1.43546	0
5448.01774	1.43543	0
5446.08916	1.43541	0
5444.16195	1.43539	0
5442.23611	1.43537	0
5440.31162	1.43535	0
5438.35892	1.43533	0
5436.43718	1.43531	0
5434.51679	1.43529	0
5432.59776	1.43527	0
5430.65059	1.43525	0
5428.73429	1.43523	0
5426.78989	1.43521	0
5424.87631	1.43519	0
5422.93468	1.43517	0
5421.02381	1.43514	0
5419.08493	1.43513	0
5417.14744	1.43510	0
5415.24065	1.43508	0
5413.30591	1.43506	0
5411.37254	1.43504	0
5409.44056	1.43502	0
5407.50995	1.43500	0
5405.58072	1.43498	0
5403.65287	1.43496	0
5401.72639	1.43493	0
5399.80129	1.43492	0
5397.87755	1.43489	0
5395.95519	1.43487	0
5394.03420	1.43485	0
5392.08550	1.43483	0
5390.16726	1.43481	0
5388.22135	1.43479	0
5386.30586	1.43476	0
5384.39173	1.43474	0
5382.44998	1.43472	0
5380.50964	1.43470	0
5378.59963	1.43468	0
5376.66206	1.43466	0
5374.72589	1.43463	0
5372.79111	1.43461	0
5370.88657	1.43459	0
5368.95456	1.43457	0
5367.02393	1.43455	0
5365.09469	1.43453	0
5363.16684	1.43450	0
5361.24038	1.43448	0
5359.31529	1.43446	0
5357.36289	1.43444	0
5355.44059	1.43441	0
5353.51967	1.43439	0
5351.60013	1.43437	0
5349.65334	1.43435	0
5347.73657	1.43432	0
5345.79259	1.43430	0
5343.87859	1.43428	0
5341.93741	1.43426	0
5340.02617	1.43423	0
5338.08779	1.43421	0
5336.15082	1.43419	0
5334.24371	1.43417	0
5332.30953	1.43414	0
5330.37675	1.43412	0
5328.44537	1.43410	0
5326.51539	1.43408	0
5324.58681	1.43405	0
5322.65963	1.43403	0
5320.73384	1.43400	0
5318.80944	1.43398	0
5316.88643	1.43396	0
5314.93657	1.43394	0
5313.01636	1.43391	0
5311.09754	1.43389	0
5309.15192	1.43386	0
5307.23589	1.43385	0
5305.29309	1.43382	0
5303.37984	1.43380	0
5301.43987	1.43377	0
5299.52940	1.43375	0
5297.59224	1.43372	0
5295.65650	1.43370	0
5293.72217	1.43368	0
5291.81726	1.43366	0
5289.88574	1.43363	0
5287.95562	1.43361	0
5286.02692	1.43358	0
5284.09962	1.43356	0
5282.17372	1.43353	0
5280.24923	1.43351	0
5278.29828	1.43349	0
5276.37661	1.43347	0
5274.45634	1.43344	0
5272.53746	1.43342	0
5270.59220	1.43339	0
5268.67614	1.43337	0
5266.73373	1.43334	0
5264.82047	1.43332	0
5262.88090	1.43329	0
5260.94276	1.43327	0
5259.03371	1.43324	0
5257.09840	1.43322	0
5255.16451	1.43319	0
5253.23205	1.43317	0
5251.30101	1.43314	0
5249.37139	1.43312	0
5247.44318	1.43309	0
5245.51639	1.43307	0
5243.59102	1.43304	0
5241.66706	1.43302	0
5239.74451	1.43299	0
5237.79594	1.43297	0
5235.87622	1.43294	0
5233.95792	1.43292	0
5232.01365	1.43289	0
5230.09817	1.43287	0
5228.15676	1.43284	0
5226.24411	1.43282	0
5224.30556	1.43279	0
5222.36845	1.43277	0
5220.46003	1.43274	0
5218.52577	1.43272	0
5216.59294	1.43269	0
5214.66154	1.43267	0
5212.73158	1.43263	0
5210.80304	1.43261	0
5208.87592	1.43258	0
5206.95024	1.43256	0
5205.02597	1.43253	0
5203.10313	1.43251	0
5201.15466	1.43248	0
5199.23467	1.43246	0
5197.31611	1.43243	0
5195.37196	1.43240	0
5193.45625	1.43237	0
5191.51499	1.43235	0
5189.60211	1.43232	0
5187.66374	1.43230	0
5185.75370	1.43227	0
5183.81819	1.43224	0
5181.88413	1.43221	0
5179.95152	1.43219	0
5178.02034	1.43216	0
5176.09060	1.43214	0
5174.16230	1.43211	0
5172.23544	1.43208	0
5170.31001	1.43205	0
5168.38602	1.43203	0
5166.46345	1.43200	0
5164.54232	1.43197	0
5162.59596	1.43194	0
5160.67770	1.43192	0
5158.73425	1.43189	0
5156.81886	1.43186	0
5154.87832	1.43183	0
5152.96579	1.43181	0
5151.02815	1.43178	0
5149.09196	1.43175	0
5147.15723	1.43172	0
5145.25042	1.43170	0
5143.31857	1.43167	0
5141.38817	1.43164	0
5139.45923	1.43161	0
5137.53172	1.43159	0
5135.60567	1.43155	0
5133.68105	1.43153	0
5131.73155	1.43150	0
5129.80984	1.43147	0
5127.88957	1.43144	0
5125.97073	1.43142	0
5124.02708	1.43138	0
5122.11113	1.43136	0
5120.17040	1.43133	0
5118.25734	1.43130	0
5116.31952	1.43127	0
5114.38318	1.43124	0
5112.44830	1.43121	0
5110.54100	1.43118	0
5108.60903	1.43115	0
5106.67851	1.43113	0
5104.74946	1.43109	0
5102.82186	1.43107	0
5100.89572	1.43104	0
5098.94503	1.43101	0
5097.02181	1.43098	0
5095.10004	1.43095	0
5093.17972	1.43092	0
5091.23493	1.43089	0
5089.31752	1.43086	0
5087.40156	1.43083	0
5085.46118	1.43080	0
5083.52227	1.43077	0
5081.61067	1.43074	0
5079.67470	1.43071	0
5077.74020	1.43068	0
5075.80718	1.43065	0
5073.90137	1.43062	0
5071.94555	1.43059	0
5070.04264	1.43056	0
5068.08979	1.43053	0
5066.16410	1.43050	0
5064.23988	1.43047	0
5062.31712	1.43043	0
5060.39582	1.43041	0
5058.45039	1.43037	0
5056.53203	1.43035	0
5054.61512	1.43031	0
5052.67413	1.43028	0
5050.73463	1.43025	0
5048.82211	1.43022	0
5046.88557	1.43019	0
5044.95051	1.43016	0
5043.04237	1.43012	0
5041.11025	1.43010	0
5039.17962	1.43006	0
5037.25047	1.43003	0
5035.32279	1.43000	0
5033.39659	1.42997	0
5031.47186	1.42993	0
5029.52330	1.42990	0
5027.60153	1.42987	0
5025.68123	1.42984	0
5023.73716	1.42980	0
5021.81981	1.42978	0
5019.87872	1.42974	0
5017.96431	1.42971	0
5016.02620	1.42967	0
5014.11473	1.42965	0
5012.17960	1.42961	0
5010.24595	1.42958	0
5008.31380	1.42954	0
5006.38314	1.42951	0
5004.45396	1.42948	0
5002.52628	1.42945	0
5000.60007	1.42941	0
4998.67535	1.42938	0
4996.75211	1.42935	0
4994.83035	1.42932	0
4992.88514	1.42928	0
4990.96635	1.42925	0
4989.02415	1.42921	0
4987.10832	1.42918	0
4985.16912	1.42914	0
4983.25626	1.42911	0
4981.32005	1.42908	0
4979.38534	1.42905	0
4977.45214	1.42901	0
4975.54520	1.42898	0
4973.61497	1.42894	0
4971.68625	1.42891	0
4969.75902	1.42887	0
4967.83328	1.42884	0
4965.88437	1.42880	0
4963.96164	1.42877	0
4962.04039	1.42873	0
4960.09603	1.42870	0
4958.17777	1.42866	0
4956.26100	1.42863	0
4954.32116	1.42859	0
4952.38284	1.42856	0
4950.47054	1.42852	0
4948.53523	1.42849	0
4946.60144	1.42845	0
4944.66915	1.42842	0
4942.73838	1.42838	0
4940.83352	1.42835	0
4938.90574	1.42831	0
4936.95508	1.42828	0
4935.03033	1.42823	0
4933.10707	1.42820	0
4931.18531	1.42816	0
4929.24075	1.42813	0
4927.32200	1.42809	0
4925.38049	1.42806	0
4923.46474	1.42802	0
4921.52626	1.42799	0
4919.61352	1.42794	0
4917.67807	1.42791	0
4915.74415	1.42787	0
4913.81174	1.42784	0
4911.90498	1.42780	0
4909.97560	1.42776	0
4908.04773	1.42772	0
4906.09730	1.42769	0
4904.17247	1.42765	0
4902.24915	1.42761	0
4900.32734	1.42757	0
4898.38304	1.42754	0
4896.46426	1.42750	0
4894.54699	1.42746	0
4892.60727	1.42742	0
4890.66909	1.42739	0
4888.75635	1.42734	0
4886.82122	1.42731	0
4884.88762	1.42727	0
4882.97940	1.42723	0
4881.04884	1.42719	0
4879.11981	1.42716	0
4877.16851	1.42711	0
4875.24254	1.42708	0
4873.31810	1.42703	0
4871.39517	1.42700	0
4869.47376	1.42696	0
4867.53017	1.42692	0
4865.61180	1.42688	0
4863.67129	1.42684	0
4861.75597	1.42680	0
4859.81853	1.42676	0
4857.90624	1.42672	0
4855.97187	1.42668	0
4854.03905	1.42664	0
4852.10776	1.42660	0
4850.17800	1.42656	0
4848.24978	1.42652	0
4846.32309	1.42647	0
4844.39794	1.42644	0
4842.47431	1.42639	0
4840.52878	1.42636	0
4838.60822	1.42631	0
4836.68919	1.42628	0
4834.74830	1.42623	0
4832.83233	1.42619	0
4830.89454	1.42615	0
4828.95830	1.42611	0
4827.04691	1.42606	0
4825.11375	1.42603	0
4823.18214	1.42598	0
4821.25208	1.42594	0
4819.32356	1.42590	0
4817.39658	1.42586	0
4815.47115	1.42581	0
4813.54725	1.42577	0
4811.60173	1.42573	0
4809.68093	1.42569	0
4807.76165	1.42564	0
4805.82081	1.42560	0
4803.90461	1.42556	0
4801.96689	1.42552	0
4800.03072	1.42547	0
4798.11914	1.42543	0
4796.18607	1.42538	0
4794.25457	1.42534	0
4792.32461	1.42530	0
4790.39621	1.42526	0
4788.46937	1.42521	0
4786.54407	1.42517	0
4784.62032	1.42512	0
4782.67524	1.42508	0
4780.75459	1.42503	0
4778.83549	1.42499	0
4776.89511	1.42494	0
4774.97911	1.42490	0
4773.04186	1.42485	0
4771.10618	1.42481	0
4769.19482	1.42476	0
4767.26226	1.42472	0
4765.33126	1.42467	0
4763.40183	1.42463	0
4761.47396	1.42458	0
4759.54765	1.42454	0
4757.62290	1.42449	0
4755.67709	1.42445	0
4753.75547	1.42439	0
4751.83540	1.42435	0
4749.89431	1.42430	0
4747.97736	1.42426	0
4746.03943	1.42421	0
4744.12559	1.42417	0
4742.19080	1.42411	0
4740.25759	1.42407	0
4738.32595	1.42402	0
4736.39589	1.42398	0
4734.46740	1.42392	0
4732.54048	1.42388	0
4730.61512	1.42383	0
4728.69133	1.42379	0
4726.74677	1.42373	0
4724.82613	1.42369	0
4722.90704	1.42364	0
4720.96723	1.42359	0
4719.05128	1.42354	0
4717.11464	1.42350	0
4715.17958	1.42344	0
4713.26832	1.42340	0
4711.33642	1.42334	0
4709.40610	1.42330	0
4707.47736	1.42324	0
4705.55020	1.42320	0
4703.62461	1.42314	0
4701.67850	1.42310	0
4699.75608	1.42304	0
4697.83524	1.42300	0
4695.89391	1.42294	0
4693.97622	1.42290	0
4692.03808	1.42284	0
4690.12354	1.42280	0
4688.18858	1.42274	0
4686.25521	1.42269	0
4684.32344	1.42264	0
4682.39326	1.42259	0
4680.46468	1.42253	0
4678.53768	1.42249	0
4676.61226	1.42243	0
4674.68843	1.42238	0
4672.76618	1.42233	0
4670.82370	1.42228	0
4668.90463	1.42222	0
4666.96535	1.42217	0
4665.04945	1.42211	0
4663.11337	1.42207	0
4661.17891	1.42201	0
4659.26775	1.42196	0
4657.33647	1.42190	0
4655.40679	1.42185	0
4653.47871	1.42179	0
4651.55222	1.42175	0
4649.62733	1.42169	0
4647.68243	1.42164	0
4645.76074	1.42158	0
4643.84064	1.42153	0
4641.90058	1.42147	0
4639.98367	1.42142	0
4638.04683	1.42136	0
4636.11160	1.42131	0
4634.17799	1.42124	0
4632.26745	1.42120	0
4630.33704	1.42113	0
4628.40824	1.42108	0
4626.48105	1.42102	0
4624.55546	1.42097	0
4622.61011	1.42091	0
4620.68774	1.42086	0
4618.76697	1.42079	0
4616.82649	1.42074	0
4614.90892	1.42068	0
4612.97168	1.42063	0
4611.05732	1.42056	0
4609.12330	1.42051	0
4607.19090	1.42045	0
4605.26013	1.42040	0
4603.33097	1.42033	0
4601.40343	1.42028	0
4599.47750	1.42021	0
4597.55318	1.42016	0
4595.60935	1.42009	0
4593.68827	1.42004	0
4591.76880	1.41998	0
4589.82986	1.41992	0
4587.91360	1.41986	0
4585.97791	1.41980	0
4584.04386	1.41974	0
4582.11144	1.41968	0
4580.20162	1.41961	0
4578.27243	1.41956	0
4576.34487	1.41949	0
4574.39801	1.41944	0
4572.47371	1.41937	0
4570.55103	1.41931	0
4568.62996	1.41924	0
4566.68965	1.41919	0
4564.77183	1.41912	0
4562.83480	1.41906	0
4560.89941	1.41899	0
4558.98645	1.41894	0
4557.05432	1.41887	0
4555.12383	1.41881	0
4553.19498	1.41874	0
4551.26776	1.41868	0
4549.34217	1.41861	0
4547.39752	1.41856	0
4545.47521	1.41848	0
4543.55451	1.41843	0
4541.61482	1.41835	0
4539.69738	1.41830	0
4537.76098	1.41822	0
4535.84680	1.41816	0
4533.91367	1.41809	0
4531.98220	1.41803	0
4530.05237	1.41796	0
4528.12418	1.41790	0
4526.19763	1.41783	0
4524.27272	1.41777	0
4522.32900	1.41769	0
4520.40738	1.41763	0
4518.48739	1.41756	0
4516.54863	1.41749	0
4514.63192	1.41742	0
4512.69647	1.41736	0
4510.76268	1.41728	0
4508.83054	1.41722	0
4506.90006	1.41715	0
4504.97124	1.41708	0
4503.04406	1.41701	0
4501.11853	1.41694	0
4499.19464	1.41687	0
4497.27240	1.41680	0
4495.33160	1.41673	0
4493.41266	1.41666	0
4491.47518	1.41658	0
4489.55953	1.41652	0
4487.62537	1.41644	0
4485.69288	1.41637	0
4483.76206	1.41630	0
4481.83289	1.41623	0
4479.90538	1.41615	0
4477.97954	1.41609	0
4476.05534	1.41600	0
4474.13280	1.41594	0
4472.19191	1.41586	0
4470.27269	1.41579	0
4468.33514	1.41571	0
4466.39928	1.41564	0
4464.48502	1.41556	0
4462.55249	1.41549	0
4460.62163	1.41541	0
4458.69244	1.41534	0
4456.76492	1.41526	0
4454.83907	1.41519	0
4452.91488	1.41510	0
4450.99235	1.41504	0
4449.05168	1.41495	0
4447.13249	1.41488	0
4445.19519	1.41480	0
4443.25958	1.41473	0
4441.34537	1.41464	0
4439.41311	1.41457	0
4437.48253	1.41448	0
4435.55362	1.41441	0
4433.62640	1.41432	0
4431.70084	1.41425	0
4429.77696	1.41416	0
4427.83514	1.41409	0
4425.91462	1.41400	0
4423.97618	1.41393	0
4422.05900	1.41384	0
4420.12394	1.41377	0
4418.19057	1.41368	0
4416.25890	1.41360	0
4414.34840	1.41351	0
4412.42008	1.41344	0
4410.49345	1.41335	0
4408.54906	1.41327	0
4406.62580	1.41318	0
4404.70422	1.41310	0
4402.76494	1.41301	0
4400.84672	1.41294	0
4398.91083	1.41284	0
4396.97664	1.41276	0
4395.06346	1.41267	0
4393.13266	1.41259	0
4391.20354	1.41250	0
4389.27612	1.41242	0
4387.35039	1.41232	0
4385.40712	1.41225	0
4383.48478	1.41215	0
4381.56413	1.41207	0
4379.62598	1.41197	0
4377.70871	1.41189	0
4375.77397	1.41179	0
4373.84093	1.41171	0
4371.90961	1.41162	0
4369.97999	1.41153	0
4368.05207	1.41143	0
4366.12585	1.41135	0
4364.20133	1.41125	0
4362.27851	1.41117	0
4360.33836	1.41107	0
4358.41894	1.41098	0
4356.48223	1.41088	0
4354.56620	1.41080	0
4352.63291	1.41070	0
4350.70133	1.41061	0
4348.77147	1.41051	0
4346.84332	1.41042	0
4344.91688	1.41032	0
4342.99215	1.41023	0
4341.05027	1.41013	0
4339.12896	1.41004	0
4337.19054	1.40993	0
4335.27265	1.40984	0
4333.33767	1.40974	0
4331.42318	1.40965	0
4329.49163	1.40954	0
4327.56181	1.40945	0
4325.63371	1.40934	0
4323.70732	1.40925	0
4321.78265	1.40914	0
4319.84103	1.40905	0
4317.91980	1.40894	0
4315.98165	1.40885	0
4314.06385	1.40874	0
4312.12916	1.40864	0
4310.19620	1.40853	0
4308.26498	1.40844	0
4306.33548	1.40833	0
4304.40771	1.40823	0
4302.48167	1.40812	0
4300.55735	1.40802	0
4298.63475	1.40791	0
4296.69541	1.40781	0
4294.77626	1.40769	0
4292.84040	1.40760	0
4290.92469	1.40748	0
4288.99230	1.40738	0
4287.06165	1.40726	0
4285.13273	1.40717	0
4283.20555	1.40705	0
4281.28010	1.40695	0
4279.33807	1.40683	0
4277.41610	1.40673	0
4275.49585	1.40660	0
4273.55906	1.40650	0
4271.62403	1.40638	0
4269.70898	1.40628	0
4267.77743	1.40615	0
4265.84762	1.40605	0
4263.91957	1.40593	0
4261.99325	1.40582	0
4260.05052	1.40569	0
4258.12770	1.40559	0
4256.20661	1.40546	0
4254.26916	1.40536	0
4252.35155	1.40523	0
4250.41760	1.40512	0
4248.48541	1.40499	0
4246.55498	1.40488	0
4244.62630	1.40475	0
4242.69938	1.40464	0
4240.77420	1.40451	0
4238.85076	1.40440	0
4236.91112	1.40427	0
4234.99119	1.40416	0
4233.05508	1.40402	0
4231.13864	1.40391	0
4229.20605	1.40377	0
4227.27523	1.40366	0
4225.34616	1.40352	0
4223.41886	1.40341	0
4221.49331	1.40327	0
4219.56952	1.40315	0
4217.62969	1.40301	0
4215.70942	1.40290	0
4213.77314	1.40276	0
4211.85638	1.40264	0
4209.92363	1.40250	0
4207.99266	1.40238	0
4206.06346	1.40223	0
4204.13603	1.40211	0
4202.21036	1.40197	0
4200.26882	1.40185	0
4198.34669	1.40170	0
4196.42632	1.40158	0
4194.49012	1.40143	0
4192.55570	1.40130	0
4190.64062	1.40115	0
4188.70975	1.40103	0
4186.78066	1.40088	0
4184.85334	1.40075	0
4182.92780	1.40060	0
4180.98655	1.40047	0
4179.06456	1.40032	0
4177.14434	1.40019	0
4175.20845	1.40003	0
4173.27435	1.39990	0
4171.34205	1.39974	0
4169.41153	1.39961	0
4167.48280	1.39945	0
4165.57320	1.39932	0
4163.63069	1.39916	0
4161.70730	1.39902	0
4159.78569	1.39886	0
4157.84856	1.39872	0
4155.93051	1.39856	0
4153.99698	1.39842	0
4152.06524	1.39826	0
4150.13529	1.39812	0
4148.20714	1.39795	0
4146.28079	1.39781	0
4144.35622	1.39764	0
4142.41627	1.39749	0
4140.49529	1.39732	0
4138.55895	1.39718	0
4136.64154	1.39701	0
4134.70881	1.39686	0
4132.77789	1.39669	0
4130.84877	1.39654	0
4128.92144	1.39636	0
4126.99592	1.39621	0
4125.07219	1.39603	0
4123.13325	1.39588	0
4121.21312	1.39570	0
4119.27781	1.39555	0
4117.34431	1.39537	0
4115.42957	1.39521	0
4113.49968	1.39503	0
4111.57161	1.39487	0
4109.64534	1.39469	0
4107.70400	1.39453	0
4105.78135	1.39434	0
4103.86050	1.39418	0
4101.92462	1.39399	0
4099.99057	1.39382	0
4098.05834	1.39363	0
4096.14471	1.39347	0
4094.21610	1.39327	0
4092.28931	1.39311	0
4090.34760	1.39291	0
4088.42444	1.39274	0
4086.48640	1.39254	0
4084.56687	1.39237	0
4082.63248	1.39217	0
4080.71657	1.39200	0
4078.78583	1.39179	0
4076.85691	1.39162	0
4074.92981	1.39141	0
4073.00453	1.39123	0
4071.06450	1.39103	0
4069.14288	1.39085	0
4067.20652	1.39063	0
4065.28853	1.39045	0
4063.35584	1.39024	0
4061.42499	1.39005	0
4059.49597	1.38984	0
4057.56879	1.38965	0
4055.64343	1.38943	0
4053.70346	1.38924	0
4051.78177	1.38902	0
4049.86190	1.38883	0
4047.92746	1.38861	0
4045.99487	1.38841	0
4044.06412	1.38818	0
4042.13522	1.38799	0
4040.20815	1.38776	0
4038.28292	1.38756	0
4036.35953	1.38732	0
4034.42169	1.38712	0
4032.50197	1.38689	0
4030.56783	1.38668	0
4028.63554	1.38644	0
4026.70511	1.38623	0
4024.77652	1.38599	0
4022.84979	1.38578	0
4020.92489	1.38554	0
4019.00184	1.38532	0
4017.06449	1.38507	0
4015.14513	1.38486	0
4013.21149	1.38461	0
4011.27972	1.38439	0
4009.34980	1.38413	0
4007.42175	1.38391	0
4005.49554	1.38365	0
4003.57119	1.38342	0
4001.63267	1.38316	0
3999.71202	1.38293	0
3997.77724	1.38267	0
3995.86029	1.38243	0
3993.92923	1.38216	0
3992.00003	1.38193	0
3990.07270	1.38165	0
3988.14723	1.38141	0
3986.20772	1.38114	0
3984.28598	1.38089	0
3982.35022	1.38061	0
3980.43220	1.38037	0
3978.50019	1.38008	0
3976.57005	1.37983	0
3974.64179	1.37954	0
3972.71539	1.37929	0
3970.79086	1.37899	0
3968.85245	1.37873	0
3966.93166	1.37844	0
3964.99701	1.37817	0
3963.06424	1.37787	0
3961.14905	1.37761	0
3959.22003	1.37730	0
3957.29290	1.37703	0
3955.35199	1.37671	0
3953.42861	1.37644	0
3951.50710	1.37612	0
3949.57187	1.37585	0
3947.63852	1.37552	0
3945.70707	1.37524	0
3943.79306	1.37491	0
3941.84983	1.37462	0
3939.92404	1.37429	0
3938.00013	1.37400	0
3936.07809	1.37366	0
3934.14246	1.37336	0
3932.20872	1.37302	0
3930.29234	1.37272	0
3928.36238	1.37237	0
3926.43433	1.37206	0
3924.49276	1.37171	0
3922.56850	1.37139	0
3920.64612	1.37103	0
3918.71027	1.37072	0
3916.79168	1.37035	0
3914.85963	1.37003	0
3912.92949	1.36965	0
3911.00126	1.36932	0
3909.07492	1.36894	0
3907.15048	1.36861	0
3905.21268	1.36822	0
3903.29204	1.36788	0
3901.35806	1.36749	0
3899.42600	1.36714	0
3897.49586	1.36674	0
3895.56762	1.36639	0
3893.64129	1.36598	0
3891.71687	1.36562	0
3889.79435	1.36521	0
3887.85861	1.36484	0
3885.92479	1.36441	0
3884.00799	1.36404	0
3882.07800	1.36361	0
3880.14993	1.36323	0
3878.22377	1.36279	0
3876.28450	1.36240	0
3874.36218	1.36196	0
3872.42677	1.36156	0
3870.50828	1.36110	0
3868.57671	1.36070	0
3866.64708	1.36024	0
3864.71936	1.35982	0
3862.79357	1.35935	0
3860.85479	1.35893	0
3858.93285	1.35845	0
3856.99794	1.35801	0
3855.07984	1.35752	0
3853.14879	1.35708	0
3851.21968	1.35658	0
3849.29250	1.35613	0
3847.36725	1.35562	0
3845.42913	1.35516	0
3843.50774	1.35464	0
3841.57351	1.35417	0
3839.64122	1.35363	0
3837.72561	1.35315	0
3835.79719	1.35261	0
3833.85602	1.35212	0
3831.93149	1.35156	0
3830.00889	1.35106	0
3828.07356	1.35049	0
3826.14019	1.34997	0
3824.22340	1.34939	0
3822.29391	1.34886	0
3820.36637	1.34827	0
3818.42620	1.34773	0
3816.50256	1.34712	0
3814.58085	1.34657	0
3812.64655	1.34594	0
3810.71420	1.34538	0
3808.78382	1.34473	0
3806.86988	1.34416	0
3804.92890	1.34350	0
3803.00437	1.34290	0
3801.08179	1.34223	0
3799.14671	1.34162	0
3797.21360	1.34093	0
3795.29687	1.34030	0
3793.36768	1.33959	0
3791.44044	1.33895	0
3789.50081	1.33822	0
3787.57750	1.33756	0
3785.65615	1.33681	0
3783.72243	1.33613	0
3781.79068	1.33536	0
3779.86090	1.33466	0
3777.93309	1.33387	0
3776.00725	1.33315	0
3774.08337	1.33233	0
3772.14722	1.33159	0
3770.22727	1.33075	0
3768.29507	1.32998	0
3766.36486	1.32911	0
3764.43661	1.32832	0
3762.51035	1.32743	0
3760.57191	1.32661	0
3758.64959	1.32569	0
3756.71513	1.32484	0
3754.79675	1.32388	0
3752.86625	1.32301	0
3750.93773	1.32202	0
3749.01120	1.32111	0
3747.08664	1.32008	0
3745.15003	1.31914	0
3743.21542	1.31807	0
3741.29681	1.31709	0
3739.36618	1.31597	0
3737.43754	1.31495	0
3735.51089	1.31379	0
3733.58622	1.31271	0
3731.64961	1.31150	0
3729.71501	1.31036	0
3727.79631	1.30909	0
3725.86570	1.30789	0
3723.93710	1.30655	0
3722.01048	1.30526	0
3720.08586	1.30384	0
3718.14940	1.30244	0
3716.22877	1.30093	0
3714.29633	1.29937	0
3712.36589	1.29773	0
3710.43746	1.29590	0
3708.51103	1.29407	0
3706.57287	1.29164	0
3704.65045	1.28949	0
3702.73002	1.28411	0
3700.79789	1.28066	0.00686
3698.86778	1.28362	0.00962
3696.93967	1.28364	0.01125
3695.01358	1.28724	0.01040
3693.07585	1.28328	0.00734
3691.15378	1.28298	0.01123
3689.22010	1.28381	0.00757
3687.28844	1.27862	0.00869
3685.37239	1.28068	0.01146
3683.43119	1.28105	0.00709
3681.50559	1.27527	0.00563
3679.58200	1.27198	0.00900
3677.64689	1.27249	0.01172
3675.72733	1.27520	0.01037
3673.79628	1.27269	0.00426
3671.86725	1.26418	0.00347
3669.94025	1.25914	0.00870
3668.01527	1.25915	0.01316
3666.07887	1.26102	0.01446
3664.15794	1.26181	0.01165
3662.22561	1.25765	0.00851
3660.29531	1.25173	0.00865
3658.36705	1.24633	0.01324
3656.44082	1.24840	0.01878
3654.51662	1.25228	0.01550
3652.58110	1.24691	0.00753
3650.66095	1.23317	0.01126
3648.72951	1.23530	0.02274
3646.80012	1.23885	0.01713
3644.87276	1.23016	0.01613
3642.93416	1.22539	0.02018
3641.01089	1.22195	0.02568
3639.07640	1.22325	0.03011
3637.15720	1.22427	0.03080
3635.22680	1.22382	0.02949
3633.29845	1.22053	0.02791
3631.37215	1.21425	0.02761
3629.43472	1.20828	0.03408
3627.51251	1.21071	0.03896
3625.57919	1.21062	0.03766
3623.66106	1.20773	0.03697
3621.73184	1.20238	0.03818
3619.79157	1.20054	0.04296
3617.86647	1.20147	0.04279
3615.94342	1.19803	0.04055
3614.00935	1.19307	0.04024
3612.07734	1.18709	0.03970
3610.16044	1.17842	0.04212
3608.23254	1.17291	0.04805
3606.29370	1.16950	0.05164
3604.36994	1.16439	0.05453
3602.43525	1.15807	0.05866
3600.51559	1.15172	0.06575
3598.58504	1.14946	0.07487
3596.65655	1.15065	0.08028
3594.73013	1.14984	0.08242
3592.80577	1.14745	0.08407
3590.87057	1.14232	0.08453
3588.93746	1.13295	0.08862
3587.01929	1.12674	0.09873
3585.09033	1.12627	0.10635
3583.15059	1.12381	0.10923
3581.22578	1.11669	0.11269
3579.30304	1.10748	0.12061
3577.36956	1.10050	0.13276
3575.43817	1.09790	0.14596
3573.50886	1.09799	0.15517
3571.58164	1.09314	0.16090
3569.65649	1.08137	0.17204
3567.73342	1.07152	0.19524
3565.79970	1.07434	0.22266
3563.86808	1.08370	0.24329
3561.93855	1.09129	0.26142
3560.01111	1.10024	0.28372
3558.08575	1.11793	0.30802
3556.16247	1.14400	0.32713
3554.22864	1.17536	0.33941
3552.29692	1.21094	0.34200
3550.36729	1.24470	0.33216
3548.43975	1.27065	0.31473
3546.51431	1.29105	0.29433
3544.59095	1.30594	0.26943
3542.65713	1.31297	0.24217
3540.72542	1.31165	0.21456
3538.79582	1.30126	0.19079
3536.86832	1.28631	0.17502
3534.94291	1.27240	0.16499
3533.01960	1.25824	0.15649
3531.08591	1.24212	0.15252
3529.15434	1.22915	0.15323
3527.22489	1.21923	0.15332
3525.29754	1.20859	0.15267
3523.37229	1.19695	0.15329
3521.44915	1.18525	0.15590
3519.51571	1.17502	0.15993
3517.58440	1.16581	0.16293
3515.65521	1.15433	0.16527
3513.72814	1.14110	0.17068
3511.80317	1.12941	0.17809
3509.86799	1.11747	0.18541
3507.94725	1.10419	0.19464
3506.01632	1.09072	0.20667
3504.08752	1.07792	0.22192
3502.16083	1.06747	0.24031
3500.23627	1.06040	0.26007
3498.30157	1.05598	0.27975
3496.36902	1.05313	0.29867
3494.43860	1.04999	0.31761
3492.51031	1.04737	0.33885
3490.58415	1.04672	0.36221
3488.66011	1.04947	0.38819
3486.72603	1.05804	0.41391
3484.80624	1.06912	0.43668
3482.87644	1.08200	0.46000
3480.94877	1.10097	0.48168
3479.01113	1.12213	0.49667
3477.08773	1.14115	0.50875
3475.15438	1.16083	0.51985
3473.23525	1.18026	0.52792
3471.30618	1.19800	0.53613
3469.37926	1.21822	0.54494
3467.44245	1.24046	0.55110
3465.51981	1.26414	0.55557
3463.58731	1.29088	0.55606
3461.65696	1.31719	0.54995
3459.72876	1.34075	0.54050
3457.80270	1.36504	0.52672
3455.87880	1.38449	0.50399
3453.94510	1.39429	0.47938
3452.01356	1.39844	0.45575
3450.09609	1.39750	0.43264
3448.15696	1.39063	0.41035
3446.23189	1.37843	0.39218
3444.30897	1.36413	0.37608
3442.37634	1.34351	0.36121
3440.44588	1.31608	0.35226
3438.51759	1.28394	0.35236
3436.59145	1.25153	0.36336
3434.66747	1.22275	0.38337
3432.73386	1.19894	0.40981
3430.80243	1.18006	0.44118
3428.87317	1.16613	0.47685
3426.94608	1.15825	0.51734
3425.02115	1.15953	0.55988
3423.08667	1.16747	0.59994
3421.16607	1.17863	0.63855
3419.23594	1.19270	0.67715
3417.30798	1.20901	0.71724
3415.38220	1.23011	0.76252
3413.44693	1.26246	0.81108
3411.51386	1.30683	0.85736
3409.59460	1.36293	0.89911
3407.66589	1.43089	0.93219
3405.73935	1.50808	0.95288
3403.80341	1.59177	0.95968
3401.88124	1.68217	0.94892
3399.94968	1.77052	0.91114
3398.02031	1.83988	0.85290
3396.09313	1.88977	0.78742
3394.16814	1.92108	0.71906
3392.23382	1.93585	0.65692
3390.30170	1.94457	0.60200
3388.38327	1.94610	0.54722
3386.44406	1.93482	0.49929
3384.51854	1.92077	0.46567
3382.59519	1.91247	0.43705
3380.66261	1.90245	0.40719
3378.73223	1.88794	0.38308
3376.80406	1.87618	0.36612
3374.87808	1.86939	0.34944
3372.95430	1.86167	0.32996
3371.02135	1.85000	0.31246
3369.09062	1.83765	0.29977
3367.16209	1.82744	0.29127
3365.23577	1.82215	0.28408
3363.31165	1.81875	0.27363
3361.37843	1.81463	0.26270
3359.44744	1.81088	0.24933
3357.51866	1.80197	0.23540
3355.59209	1.79215	0.22664
3353.66774	1.78525	0.21818
3351.73435	1.77599	0.20796
3349.80320	1.76355	0.20274
3347.87427	1.75563	0.20224
3345.94756	1.75166	0.20064
3344.02306	1.74995	0.19764
3342.08961	1.74917	0.19090
3340.16955	1.74491	0.18224
3338.24055	1.73933	0.17554
3336.30264	1.73349	0.16817
3334.37811	1.72512	0.16227
3332.45579	1.71682	0.15886
3330.52459	1.70961	0.15803
3328.59563	1.70562	0.15658
3326.66891	1.69978	0.15389
3324.73336	1.69423	0.15465
3322.81110	1.69293	0.15627
3320.88003	1.69474	0.15353
3318.95121	1.69299	0.14730
3317.02463	1.68947	0.14257
3315.08929	1.68555	0.13749
3313.16719	1.67946	0.13253
3311.23635	1.67192	0.13148
3309.30776	1.66905	0.13192
3307.38141	1.66616	0.12903
3305.44638	1.66228	0.12605
3303.52453	1.65550	0.12347
3301.59401	1.65112	0.12574
3299.66574	1.64961	0.12336
3297.73973	1.64336	0.12217
3295.80510	1.64058	0.12393
3293.88359	1.63907	0.12255
3291.95348	1.63579	0.12067
3290.02563	1.63296	0.11852
3288.10004	1.62658	0.11378
3286.16590	1.61529	0.11573
3284.23403	1.61082	0.12276
3282.30444	1.60856	0.12645
3280.37711	1.60750	0.13154
3278.45205	1.60868	0.13302
3276.52924	1.60735	0.13456
3274.59796	1.60821	0.13505
3272.66896	1.60471	0.13380
3270.74223	1.60080	0.13730
3268.80708	1.59879	0.14163
3266.88489	1.59897	0.14780
3264.95431	1.60311	0.15221
3263.02600	1.60755	0.15284
3261.09997	1.60995	0.15225
3259.16559	1.61226	0.15132
3257.24411	1.61269	0.14952
3255.31430	1.61286	0.14866
3253.38678	1.61116	0.14693
3251.45096	1.60782	0.14824
3249.52801	1.60470	0.15216
3247.59678	1.60459	0.16031
3245.66784	1.61004	0.16759
3243.74120	1.61852	0.17241
3241.81684	1.62859	0.17291
3239.88427	1.63758	0.17093
3237.95400	1.64665	0.16625
3236.02603	1.65340	0.15848
3234.10035	1.65644	0.14984
3232.16652	1.65759	0.14297
3230.23500	1.65798	0.13565
3228.31621	1.65600	0.13011
3226.37887	1.65495	0.12603
3224.45426	1.65342	0.12258
3222.52156	1.65399	0.12000
3220.60154	1.65433	0.11403
3218.67346	1.65068	0.10938
3216.73733	1.64873	0.10759
3214.81386	1.64729	0.10451
3212.88237	1.64555	0.10241
3210.95320	1.64465	0.09937
3209.02635	1.64177	0.09585
3207.10181	1.63807	0.09495
3205.16930	1.63673	0.09458
3203.23912	1.63408	0.09377
3201.31126	1.63400	0.09582
3199.38572	1.63609	0.09370
3197.45227	1.63546	0.09136
3195.53137	1.63548	0.08873
3193.60258	1.63351	0.08597
3191.66592	1.63196	0.08491
3189.74179	1.63110	0.08324
3187.80982	1.62948	0.08184
3185.88018	1.62906	0.08053
3183.95288	1.62673	0.07809
3182.02791	1.62495	0.07903
3180.09515	1.62554	0.07778
3178.17484	1.62447	0.07642
3176.24676	1.62424	0.07479
3174.31094	1.62278	0.07241
3172.38754	1.61948	0.07126
3170.45642	1.61860	0.07359
3168.52765	1.62027	0.07173
3166.60122	1.61873	0.07068
3164.66712	1.61960	0.06877
3162.74539	1.61692	0.06667
3160.81600	1.61667	0.06603
3158.88896	1.61354	0.06358
3156.95430	1.61115	0.06616
3155.03196	1.61311	0.06697
3153.10202	1.61413	0.06472
3151.17444	1.61346	0.06273
3149.23930	1.61276	0.06006
3147.31644	1.60904	0.05859
3145.38603	1.60801	0.05991
3143.45799	1.60690	0.05890
3141.53231	1.60601	0.06056
3139.59914	1.60781	0.05935
3137.66834	1.60568	0.05762
3135.73991	1.60598	0.05933
3133.81385	1.60796	0.05579
3131.89016	1.60325	0.05362
3129.95903	1.60269	0.05662
3128.03028	1.60350	0.05569
3126.10391	1.60398	0.05642
3124.17014	1.60589	0.05353
3122.24852	1.60312	0.05177
3120.31952	1.60372	0.05316
3118.38318	1.60581	0.05060
3116.45895	1.60452	0.04723
3114.52740	1.60297	0.04587
3112.59824	1.60130	0.04416
3110.67147	1.59980	0.04447
3108.74708	1.60022	0.04251
3106.81542	1.59616	0.04106
3104.88616	1.59549	0.04474
3102.95929	1.59899	0.04388
3101.03482	1.59895	0.04056
3099.10312	1.59837	0.03855
3097.17383	1.59670	0.03551
3095.24694	1.59393	0.03512
3093.31288	1.59338	0.03413
3091.39079	1.59079	0.03328
3089.46154	1.59047	0.03329
3087.53470	1.58792	0.03144
3085.60074	1.58583	0.03368
3083.67871	1.58689	0.03406
3081.74957	1.58700	0.03328
3079.81336	1.58689	0.03190
3077.88906	1.58574	0.03068
3075.95770	1.58472	0.03028
3074.02876	1.58469	0.02929
3072.10224	1.58259	0.02726
3070.17813	1.58037	0.02863
3068.24702	1.58126	0.02907
3066.31833	1.58159	0.02769
3064.39207	1.58063	0.02548
3062.45885	1.57817	0.02485
3060.52806	1.57704	0.02524
3058.59971	1.57659	0.02525
3056.67379	1.57600	0.02425
3054.75029	1.57430	0.02423
3052.81989	1.57420	0.02485
3050.89193	1.57457	0.02427
3048.96640	1.57434	0.02268
3047.03402	1.57284	0.02166
3045.10408	1.57185	0.02126
3043.17659	1.57068	0.02105
3041.25154	1.57055	0.02126
3039.31968	1.57104	0.02028
3037.39027	1.57085	0.01785
3035.46332	1.56838	0.01531
3033.52960	1.56489	0.01483
3031.60754	1.56231	0.01619
3029.67873	1.56157	0.01779
3027.74321	1.56175	0.01842
3025.81932	1.56175	0.01793
3023.88872	1.56085	0.01767
3021.96059	1.56082	0.01797
3020.03491	1.56141	0.01691
3018.10258	1.56062	0.01459
3016.17272	1.55804	0.01327
3014.24532	1.55578	0.01344
3012.32039	1.55417	0.01391
3010.38885	1.55282	0.01431
3008.45979	1.55153	0.01504
3006.53320	1.55078	0.01573
3004.60907	1.54994	0.01643
3002.67839	1.54971	0.01742
3000.75019	1.55014	0.01784
2998.81547	1.55050	0.01731
2996.89222	1.55005	0.01648
2994.96247	1.54919	0.01586
2993.03521	1.54804	0.01565
2991.10147	1.54710	0.01567
2989.17917	1.54599	0.01587
2987.25042	1.54526	0.01655
2985.32415	1.54515	0.01714
2983.39146	1.54542	0.01708
2981.46127	1.54531	0.01634
2979.53358	1.54438	0.01534
2977.60838	1.54253	0.01523
2975.67682	1.54130	0.01633
2973.74775	1.54124	0.01740
2971.82119	1.54161	0.01750
2969.88830	1.54127	0.01716
2967.96674	1.54068	0.01730
2966.03886	1.54051	0.01778
2964.10469	1.54099	0.01775
2962.18182	1.54106	0.01690
2960.25269	1.54042	0.01605
2958.31731	1.53941	0.01568
2956.39320	1.53867	0.01563
2954.46286	1.53801	0.01541
2952.53505	1.53699	0.01508
2950.60974	1.53557	0.01548
2948.67825	1.53494	0.01653
2946.74929	1.53506	0.01719
2944.82285	1.53519	0.01718
2942.89027	1.53493	0.01723
2940.96887	1.53512	0.01729
2939.03271	1.53527	0.01656
2937.10771	1.53446	0.01546
2935.17662	1.53279	0.01534
2933.24807	1.53187	0.01620
2931.32206	1.53174	0.01671
2929.38998	1.53144	0.01661
2927.46903	1.53066	0.01680
2925.53347	1.53021	0.01735
2923.60902	1.53003	0.01793
2921.67856	1.53038	0.01829
2919.75065	1.53068	0.01782
2917.82529	1.53009	0.01706
2915.89395	1.52889	0.01705
2913.96518	1.52793	0.01778
2912.03895	1.52761	0.01914
2910.10680	1.52874	0.02014
2908.17721	1.52993	0.01949
2906.25018	1.52990	0.01838
2904.32570	1.52942	0.01795
2902.39535	1.52931	0.01747
2900.46756	1.52875	0.01657
2898.53392	1.52740	0.01598
2896.61125	1.52586	0.01650
2894.68276	1.52536	0.01760
2892.74846	1.52546	0.01815
2890.82510	1.52551	0.01824
2888.89595	1.52530	0.01815
2886.96938	1.52477	0.01813
2885.03704	1.52420	0.01853
2883.10730	1.52385	0.01896
2881.18013	1.52329	0.01976
2879.25554	1.52369	0.02126
2877.32524	1.52544	0.02171
2875.39752	1.52641	0.02045
2873.46413	1.52602	0.01974
2871.54159	1.52612	0.01955
2869.61338	1.52609	0.01891
2867.67953	1.52578	0.01851
2865.75650	1.52566	0.01817
2863.82785	1.52533	0.01746
2861.89360	1.52442	0.01712
2859.97014	1.52380	0.01726
2858.04110	1.52330	0.01740
2856.11466	1.52286	0.01768
2854.18266	1.52270	0.01825
2852.25328	1.52322	0.01854
2850.32650	1.52374	0.01804
2848.39422	1.52367	0.01701
2846.47265	1.52263	0.01619
2844.53749	1.52125	0.01630
2842.61304	1.52031	0.01731
2840.68313	1.52039	0.01846
2838.75583	1.52098	0.01919
2836.82310	1.52197	0.01942
2834.90103	1.52301	0.01895
2832.96552	1.52368	0.01766
2831.04066	1.52318	0.01615
2829.11041	1.52207	0.01545
2827.18280	1.52114	0.01541
2825.25780	1.52061	0.01549
2823.32746	1.52019	0.01549
2821.39975	1.51979	0.01540
2819.46673	1.51929	0.01539
2817.54428	1.51892	0.01534
2815.60861	1.51820	0.01525
2813.68351	1.51736	0.01559
2811.75313	1.51672	0.01642
2809.82540	1.51674	0.01754
2807.90031	1.51748	0.01836
2805.96998	1.51853	0.01834
2804.04231	1.51903	0.01771
2802.11728	1.51904	0.01731
2800.18705	1.51940	0.01722
2798.25948	1.52017	0.01622
2796.32675	1.51954	0.01448
2794.39668	1.51784	0.01407
2792.46927	1.51706	0.01492
2790.54452	1.51745	0.01511
2788.61464	1.51719	0.01441
2786.68744	1.51627	0.01439
2784.75514	1.51601	0.01494
2782.82551	1.51625	0.01484
2780.89856	1.51591	0.01444
2778.97428	1.51545	0.01428
2777.04495	1.51474	0.01422
2775.11829	1.51407	0.01473
2773.18661	1.51403	0.01543
2771.25762	1.51429	0.01567
2769.33132	1.51437	0.01579
2767.40003	1.51461	0.01588
2765.47143	1.51487	0.01576
2763.54552	1.51513	0.01542
2761.61466	1.51510	0.01483
2759.68650	1.51461	0.01431
2757.75342	1.51393	0.01439
2755.83065	1.51386	0.01475
2753.90297	1.51412	0.01472
2751.97041	1.51432	0.01419
2750.04056	1.51392	0.01330
2748.11342	1.51256	0.01269
2746.18898	1.51076	0.01370
2744.25969	1.51080	0.01604
2742.32560	1.51285	0.01708
2740.40174	1.51456	0.01594
2738.47308	1.51468	0.01448
2736.54713	1.51440	0.01349
2734.61642	1.51368	0.01250
2732.68842	1.51239	0.01226
2730.75568	1.51166	0.01296
2728.83312	1.51181	0.01331
2726.89840	1.51166	0.01329
2724.97384	1.51178	0.01362
2723.04458	1.51234	0.01328
2721.11805	1.51208	0.01239
2719.18685	1.51127	0.01232
2717.25839	1.51113	0.01260
2715.33267	1.51104	0.01265
2713.40231	1.51131	0.01289
2711.47469	1.51213	0.01237
2709.54247	1.51205	0.01078
2707.61300	1.51054	0.00996
2705.68627	1.50950	0.01046
2703.76229	1.50942	0.01086
2701.83373	1.50945	0.01046
2699.90064	1.50858	0.00988
2697.97032	1.50733	0.01024
2696.04275	1.50681	0.01135
2694.11793	1.50719	0.01215
2692.18861	1.50768	0.01243
2690.26206	1.50829	0.01232
2688.33103	1.50858	0.01172
2686.40277	1.50840	0.01111
2684.47728	1.50792	0.01068
2682.54735	1.50729	0.01064
2680.62019	1.50697	0.01102
2678.68862	1.50717	0.01119
2676.75984	1.50732	0.01101
2674.83383	1.50741	0.01058
2672.90344	1.50702	0.01000
2670.97584	1.50634	0.00987
2669.04390	1.50586	0.01014
2667.11474	1.50580	0.01047
2665.18838	1.50601	0.01059
2663.26479	1.50629	0.01025
2661.32981	1.50610	0.00964
2659.40472	1.50548	0.00939
2657.47535	1.50517	0.00970
2655.54877	1.50554	0.00965
2653.61794	1.50555	0.00881
2651.68992	1.50470	0.00811
2649.75768	1.50370	0.00822
2647.83526	1.50320	0.00853
2645.90163	1.50260	0.00878
2643.97781	1.50220	0.00965
2642.04981	1.50284	0.01042
2640.11764	1.50359	0.01011
2638.18830	1.50368	0.00974
2636.26178	1.50410	0.00944
2634.33113	1.50437	0.00833
2632.40331	1.50358	0.00699
2630.47830	1.50193	0.00659
2628.54920	1.50068	0.00744
2626.61603	1.50071	0.00856
2624.69258	1.50152	0.00862
2622.76508	1.50164	0.00768
2620.83353	1.50071	0.00687
2618.90483	1.49923	0.00699
2616.97896	1.49829	0.00820
2615.04908	1.49860	0.00962
2613.12205	1.49977	0.01000
2611.19104	1.50042	0.00945
2609.26288	1.50059	0.00893
2607.33077	1.50075	0.00832
2605.40831	1.50048	0.00739
2603.47512	1.49966	0.00684
2601.55157	1.49890	0.00658
2599.61734	1.49792	0.00655
2597.69273	1.49706	0.00705
2595.76423	1.49667	0.00788
2593.83187	1.49701	0.00850
2591.90910	1.49738	0.00844
2589.97576	1.49739	0.00818
2588.05200	1.49727	0.00796
2586.12441	1.49692	0.00765
2584.19301	1.49629	0.00783
2582.26449	1.49631	0.00827
2580.33219	1.49650	0.00809
2578.40943	1.49613	0.00786
2576.47626	1.49585	0.00821
2574.55261	1.49621	0.00826
2572.61859	1.49617	0.00773
2570.69409	1.49564	0.00759
2568.76586	1.49557	0.00800
2566.83394	1.49630	0.00771
2564.90492	1.49628	0.00630
2562.97880	1.49488	0.00521
2561.04901	1.49320	0.00550
2559.12212	1.49240	0.00627
2557.19159	1.49176	0.00692
2555.26397	1.49141	0.00795
2553.33926	1.49182	0.00896
2551.40442	1.49279	0.00907
2549.47901	1.49294	0.00833
2547.55002	1.49225	0.00824
2545.62395	1.49220	0.00906
2543.69431	1.49322	0.00908
2541.76760	1.49349	0.00807
2539.83735	1.49303	0.00734
2537.91003	1.49239	0.00698
2535.97920	1.49176	0.00683
2534.05131	1.49112	0.00694
2532.12635	1.49074	0.00714
2530.19151	1.49038	0.00734
2528.26601	1.49022	0.00754
2526.33706	1.49007	0.00768
2524.41105	1.49012	0.00766
2522.48162	1.48992	0.00741
2520.54877	1.48961	0.00715
2518.62523	1.48904	0.00702
2516.69196	1.48854	0.00687
2514.76797	1.48752	0.00699
2512.84062	1.48692	0.00775
2510.90990	1.48691	0.00854
2508.98216	1.48739	0.00834
2507.05108	1.48631	0.00788
2505.12298	1.48535	0.00874
2503.19784	1.48453	0.01016
2501.26939	1.48593	0.01254
2499.33768	1.48848	0.01172
2497.40894	1.48877	0.00990
2495.48318	1.48779	0.00846
2493.55416	1.48603	0.00862
2491.62192	1.48554	0.00955
2489.69267	1.48544	0.00998
2487.76641	1.48518	0.01010
2485.83694	1.48441	0.01066
2483.91047	1.48426	0.01208
2481.98082	1.48535	0.01330
2480.05416	1.48697	0.01321
2478.12436	1.48787	0.01208
2476.19755	1.48757	0.01068
2474.26762	1.48622	0.01038
2472.34069	1.48572	0.01141
2470.41066	1.48649	0.01201
2468.48364	1.48729	0.01157
2466.55353	1.48758	0.01075
2464.62645	1.48745	0.00974
2462.69631	1.48666	0.00881
2460.76919	1.48556	0.00849
2458.83903	1.48465	0.00852
2456.91191	1.48367	0.00864
2454.98177	1.48276	0.00928
2453.05467	1.48239	0.01003
2451.12458	1.48226	0.01049
2449.19752	1.48192	0.01061
2447.26750	1.48094	0.01108
2445.34053	1.48027	0.01277
2443.41061	1.48130	0.01466
2441.48374	1.48324	0.01493
2439.55395	1.48432	0.01398
2437.62721	1.48453	0.01289
2435.69758	1.48404	0.01182
2433.77101	1.48271	0.01131
2431.84156	1.48123	0.01195
2429.90927	1.48045	0.01357
2427.98594	1.48114	0.01552
2426.05388	1.48313	0.01613
2424.12489	1.48438	0.01505
2422.19897	1.48436	0.01412
2420.27025	1.48436	0.01355
2418.33875	1.48384	0.01259
2416.41033	1.48231	0.01252
2414.48498	1.48145	0.01394
2412.55688	1.48207	0.01529
2410.62604	1.48324	0.01577
2408.69829	1.48446	0.01545
2406.76783	1.48520	0.01443
2404.84046	1.48529	0.01307
2402.91041	1.48430	0.01172
2400.98344	1.48246	0.01155
2399.05381	1.48132	0.01279
2397.12728	1.48142	0.01397
2395.19811	1.48188	0.01468
2393.27203	1.48269	0.01499
2391.34334	1.48330	0.01456
2389.41204	1.48318	0.01417
2387.48385	1.48322	0.01443
2385.55878	1.48404	0.01441
2383.62545	1.48500	0.01285
2381.70092	1.48265	0.01059
2379.76816	1.48032	0.01370
2377.84420	1.48369	0.01435
2375.91205	1.48255	0.01205
2373.98868	1.48280	0.01286
2372.05717	1.48079	0.00983
2370.12879	1.47652	0.01535
2368.19794	1.48373	0.01863
2366.27024	1.48465	0.01340
2364.34567	1.48478	0.01438
2362.41306	1.48595	0.00908
2360.48362	1.48030	0.00894
2358.55732	1.48022	0.00999
2356.62861	1.47777	0.01208
2354.70305	1.48175	0.01170
2352.76956	1.47549	0.00936
2350.84478	1.47749	0.01604
2348.91762	1.47732	0.01243
2346.98811	1.47764	0.01865
2345.05627	1.48189	0.01355
2343.12761	1.47751	0.01585
2341.20211	1.48211	0.01511
2339.27431	1.47855	0.01423
2337.34422	1.48123	0.01618
2335.41730	1.48182	0.01399
2333.48812	1.48106	0.01166
2331.55669	1.47775	0.01337
2329.62845	1.48051	0.01359
2327.70339	1.47724	0.01284
2325.77611	1.47939	0.01491
2323.84662	1.47743	0.01314
2321.91493	1.47858	0.01638
2319.98645	1.47978	0.01405
2318.06117	1.47889	0.01408
2316.12836	1.47826	0.01413
2314.20412	1.47920	0.01410
2312.27239	1.47644	0.01342
2310.34387	1.47848	0.01724
2308.41857	1.47982	0.01307
2306.48584	1.47656	0.01449
2304.56165	1.47798	0.01604
2302.63006	1.47987	0.01561
2300.70171	1.47850	0.01298
2298.77131	1.47791	0.01638
2296.84414	1.48169	0.01328
2294.91493	1.47746	0.01097
2292.98896	1.47659	0.01296
2291.06097	1.47655	0.01312
2289.13098	1.47618	0.01260
2287.20424	1.47434	0.01314
2285.27551	1.47415	0.01471
2283.34483	1.47452	0.01580
2281.41740	1.47545	0.01577
2279.48803	1.47495	0.01563
2277.56192	1.47479	0.01626
2275.63388	1.47503	0.01740
2273.70393	1.47685	0.01771
2271.77726	1.47802	0.01632
2269.84869	1.47782	0.01410
2267.91826	1.47550	0.01296
2265.99110	1.47348	0.01377
2264.06209	1.47255	0.01555
2262.13124	1.47301	0.01667
2260.20369	1.47290	0.01724
2258.27432	1.47299	0.01833
2256.34824	1.47387	0.01964
2254.42035	1.47585	0.01961
2252.49069	1.47649	0.01830
2250.55926	1.47625	0.01752
2248.63115	1.47600	0.01726
2246.70633	1.47585	0.01666
2244.77473	1.47488	0.01649
2242.84644	1.47452	0.01700
2240.91645	1.47457	0.01720
2238.98977	1.47442	0.01683
2237.06140	1.47345	0.01698
2235.13135	1.47321	0.01783
2233.20463	1.47337	0.01823
2231.27625	1.47336	0.01827
2229.34622	1.47301	0.01858
2227.41953	1.47292	0.01895
2225.49122	1.47260	0.01955
2223.56130	1.47290	0.02036
2221.63472	1.47331	0.02077
2219.70655	1.47376	0.02107
2217.77681	1.47421	0.02128
2215.85042	1.47471	0.02117
2213.92247	1.47484	0.02112
2211.99298	1.47518	0.02104
2210.06197	1.47510	0.02087
2208.13433	1.47517	0.02115
2206.20517	1.47555	0.02128
2204.27939	1.47595	0.02115
2202.34726	1.47629	0.02094
2200.41852	1.47662	0.02034
2198.49315	1.47623	0.01968
2196.56150	1.47572	0.01956
2194.63324	1.47537	0.01960
2192.70837	1.47498	0.01953
2190.77727	1.47420	0.01979
2188.84956	1.47354	0.02081
2186.92047	1.47389	0.02262
2184.99477	1.47604	0.02346
2183.06292	1.47773	0.02215
2181.13450	1.47760	0.02050
2179.20947	1.47665	0.02019
2177.27836	1.47668	0.02060
2175.35067	1.47731	0.02029
2173.42166	1.47736	0.01905
2171.49136	1.47604	0.01826
2169.56448	1.47482	0.01892
2167.63632	1.47473	0.02000
2165.70690	1.47544	0.02035
2163.78090	1.47590	0.01987
2161.84899	1.47563	0.01894
2159.92051	1.47421	0.01867
2157.99548	1.47314	0.01988
2156.06458	1.47345	0.02135
2154.13713	1.47449	0.02183
2152.20849	1.47508	0.02168
2150.27868	1.47551	0.02155
2148.35232	1.47600	0.02117
2146.42020	1.47622	0.02019
2144.49615	1.47518	0.01913
[truncated: 696 more rows]
