# Supplementary material
Source: publisher figshare collection journal article supplement (https://acs.figshare.com/ndownloader/files/4136596)
Supplement: Supplementary file 1 [file 4136596 › Readme.pdf]

# Infrared Optical Constants of Crystalline Sodium Chloride Dihydrate: Application to Study the Crystallization of Aqueous Sodium Chloride Solution Droplets at Low Temperatures

*Robert Wagner\*, Ottmar Möhler, and Martin Schnaiter*

Karlsruhe Institute of Technology (KIT), Institute for Meteorology and Climate Research  
(IMK-AAF), Hermann-von-Helmholtz-Platz 1, D-76344 Eggenstein-Leopoldshafen,  
Germany

\*Corresponding author. E-mail address: [Robert.Wagner2@kit.edu](mailto:Robert.Wagner2@kit.edu)

Complex refractive indices of sodium chloride dihydrate from 6000 to 800 wave numbers as shown in the left panels of Fig. 7 in the manuscript.

The data file (NaCl\_dihydrate.txt) contains three columns, separated by <TAB>:

First column: wave number in  $\text{cm}^{-1}$ .

Second column: Real part ( $n$ ) of the complex refractive index.

Third column: Imaginary part ( $k$ ) of the complex refractive index.
